# Supplementary material
Source: PubMed Central journal article supplement (PMC3491460)
Supplement: 1215037109_pnas.201215037SI.pdf [file 1215037109_pnas.201215037SI.pdf]

# Supporting Information

Reid et al. 10.1073/pnas.1215037109

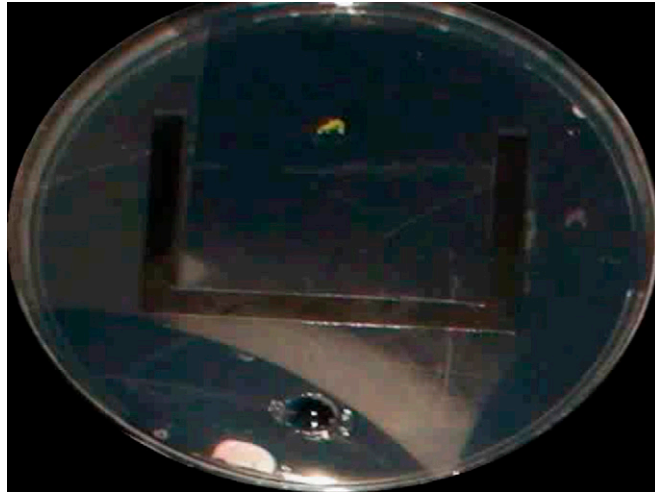

Movie S1. Plasmodium solving U-shaped trap problem on substrate of blank agar.

[Movie S1](#)

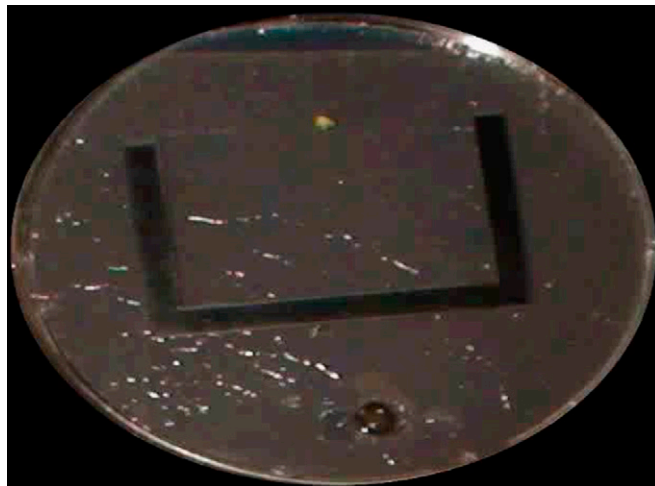

Movie S2. Plasmodium solving U-shaped trap problem on substrate of extracellular slime.

[Movie S2](#)
